# Supplementary material for: Impact of emissions of VOCs and NO x on trends of ground-level O 3 in Mexico during 1993–2014: Comparison of Monterrey with Mexico City and Guadalajara
Source: Copernicus journal article supplement (doi:10.5194/acp-2016-654), 2016-09-12
Supplement: Supplementary file 1 [file acp-2016-654-supplement.pdf]

**Table S1.** Statistics of O<sub>x</sub> data in units of ppb at the 5 monitoring sites within the MMA during 1993-2014.

| Year | GPE  |      |      |        |      | SNN |     |    |        |     | OBI |     |    |        |     | SNB |     |    |        |     | STA |     |    |        |     |
|------|------|------|------|--------|------|-----|-----|----|--------|-----|-----|-----|----|--------|-----|-----|-----|----|--------|-----|-----|-----|----|--------|-----|
|      | Min  | AVG  | SD   | Median | Max  | Min | AVG | SD | Median | Max | Min | AVG | SD | Median | Max | Min | AVG | SD | Median | Max | Min | AVG | SD | Median | Max |
| 1993 | 5    | 37   | 21   | 33     | 190  | 4   | 35  | 17 | 32     | 158 | 6   | 51  | 27 | 45     | 330 | 7   | 42  | 21 | 37     | 250 | 10  | 46  | 28 | 39     | 286 |
| 1994 | 3    | 35   | 17   | 31     | 148  | 6   | 32  | 14 | 30     | 153 | 2   | 41  | 21 | 36     | 233 | 7   | 32  | 16 | 30     | 191 | 8   | 46  | 27 | 39     | 251 |
| 1995 | 2    | 35   | 17   | 32     | 190  | 3   | 30  | 15 | 28     | 184 | 4   | 39  | 18 | 35     | 160 | 4   | 32  | 18 | 29     | 193 | 11  | 44  | 23 | 39     | 211 |
| 1996 | 2    | 36   | 20   | 33     | 213  | 3   | 32  | 16 | 30     | 171 | 6   | 46  | 25 | 41     | 220 | 7   | 37  | 20 | 34     | 219 | 10  | 45  | 26 | 38     | 196 |
| 1997 | 5    | 36   | 19   | 32     | 230  | 5   | 33  | 17 | 31     | 260 | 5   | 44  | 25 | 39     | 200 | 6   | 37  | 19 | 33     | 204 | 6   | 46  | 27 | 38     | 213 |
| 1998 | 8    | 40   | 19   | 36     | 162  | 6   | 38  | 14 | 36     | 146 | 1   | 40  | 23 | 37     | 216 | 0   | 40  | 22 | 37     | 209 | 0   | 37  | 23 | 33     | 181 |
| 1999 | NR   | NR   | NR   | NR     | NR   | NR  | NR  | NR | NR     | NR  | 7   | 41  | 18 | 38     | 142 | 1   | 30  | 19 | 26     | 171 | 5   | 39  | 24 | 34     | 208 |
| 2000 | 1    | 34   | 18   | 32     | 102  | 1   | 27  | 14 | 25     | 110 | 2   | 46  | 31 | 40     | 290 | 1   | 31  | 20 | 26     | 163 | 0   | 39  | 26 | 32     | 179 |
| 2001 | 1    | 34   | 18   | 31     | 161  | 4   | 31  | 14 | 29     | 117 | 2   | 51  | 27 | 46     | 251 | 1   | 26  | 17 | 21     | 228 | 0   | 34  | 25 | 27     | 207 |
| 2002 | 1    | 37   | 20   | 34     | 130  | 2   | 19  | 16 | 16     | 89  | 6   | 48  | 23 | 43     | 233 | 0   | 29  | 21 | 23     | 133 | 1   | 32  | 21 | 26     | 146 |
| 2003 | 1    | 29   | 18   | 25     | 143  | 5   | 30  | 17 | 27     | 138 | 2   | 30  | 21 | 25     | 160 | 3   | 29  | 14 | 26     | 108 | 1   | 31  | 21 | 26     | 139 |
| 2004 | 4    | 37   | 20   | 33     | 169  | 6   | 33  | 17 | 30     | 167 | 3   | 37  | 22 | 33     | 225 | 3   | 39  | 19 | 35     | 158 | 2   | 38  | 25 | 31     | 182 |
| 2005 | 8    | 42   | 20   | 39     | 166  | 8   | 40  | 19 | 38     | 170 | 8   | 42  | 22 | 38     | 179 | 10  | 41  | 21 | 37     | 196 | 5   | 46  | 26 | 40     | 192 |
| 2006 | 7    | 41   | 20   | 37     | 190  | 9   | 39  | 18 | 36     | 173 | 11  | 47  | 22 | 42     | 185 | 8   | 42  | 21 | 38     | 183 | 2   | 51  | 26 | 46     | 239 |
| 2007 | 7    | 38   | 19   | 35     | 170  | 8   | 39  | 17 | 36     | 146 | 13  | 45  | 22 | 41     | 189 | 9   | 40  | 19 | 37     | 162 | 0   | 47  | 26 | 42     | 185 |
| 2008 | 7    | 41   | 21   | 38     | 220  | 6   | 40  | 18 | 37     | 145 | 9   | 45  | 22 | 41     | 171 | 10  | 44  | 21 | 40     | 172 | 2   | 42  | 25 | 36     | 188 |
| 2009 | 4    | 40   | 18   | 37     | 155  | 7   | 37  | 16 | 34     | 142 | 10  | 41  | 18 | 38     | 168 | 10  | 43  | 19 | 40     | 166 | 5   | 43  | 22 | 37     | 176 |
| 2010 | 7    | 39   | 19   | 35     | 155  | 8   | 46  | 18 | 43     | 162 | 10  | 43  | 22 | 39     | 168 | 6   | 43  | 19 | 40     | 145 | 1   | 34  | 23 | 30     | 181 |
| 2011 | 7    | 41   | 19   | 38     | 142  | 3   | 41  | 19 | 38     | 147 | 3   | 40  | 23 | 36     | 147 | 1   | 43  | 22 | 39     | 165 | 1   | 45  | 26 | 39     | 172 |
| 2012 | 8    | 37   | 17   | 34     | 149  | 2   | 37  | 16 | 34     | 136 | 13  | 42  | 19 | 38     | 153 | 12  | 43  | 19 | 40     | 163 | 6   | 46  | 22 | 41     | 219 |
| 2013 | 8    | 39   | 18   | 36     | 182  | 7   | 34  | 16 | 31     | 138 | 3   | 40  | 20 | 35     | 162 | 6   | 42  | 20 | 39     | 158 | 3   | 43  | 21 | 40     | 222 |
| 2014 | N.A. | N.A. | N.A. | N.A.   | N.A. | 8   | 37  | 17 | 33     | 153 | 6   | 36  | 21 | 30     | 175 | 3   | 34  | 22 | 30     | 164 | 3   | 37  | 22 | 31     | 173 |

NR: No records.

AVG: Average.

SD: Standard deviation for the averages.

**Table S2.** Averaged O<sub>x</sub> growth rates in units of ppb yr<sup>-1</sup> for 1993-2014 calculated by wind sector within the MMA.

| Site | N                  | NE                 | E                 | SE                | S                  | SW                 | W                  | NW                 |
|------|--------------------|--------------------|-------------------|-------------------|--------------------|--------------------|--------------------|--------------------|
| GPE  | 0.13 <sup>a</sup>  | 0.20 <sup>d</sup>  | 0.47 <sup>d</sup> | 0.52 <sup>d</sup> | 0.06               | 0.04               | -0.16 <sup>b</sup> | -0.02              |
| SNN  | 0.38 <sup>d</sup>  | 0.25 <sup>d</sup>  | 0.37 <sup>d</sup> | 0.55 <sup>d</sup> | 0.15 <sup>a</sup>  | -0.15              | 0.08               | 0.21 <sup>d</sup>  |
| OBI  | -0.42 <sup>d</sup> | -0.22 <sup>b</sup> | 0.10              | -0.02             | -0.31 <sup>b</sup> | -0.48 <sup>d</sup> | -0.45 <sup>d</sup> | -0.46 <sup>d</sup> |
| SNB  | 0.70 <sup>d</sup>  | 0.75 <sup>d</sup>  | 0.78 <sup>d</sup> | 0.49 <sup>d</sup> | 0.24 <sup>d</sup>  | 0.44 <sup>d</sup>  | 0.48 <sup>d</sup>  | 0.54 <sup>d</sup>  |
| STA  | 0.04               | 0.00               | -0.13             | 0.02              | -0.12              | -0.08              | -0.05              | 0.06               |

<sup>a</sup>Level of significance  $p < 0.1$ .

<sup>b</sup>Level of significance  $p < 0.05$ .

<sup>c</sup>Level of significance  $p < 0.01$ .

<sup>d</sup>Level of significance  $p < 0.001$ .

**Table S3.** Averaged NO<sub>x</sub> growth rates in units of ppb yr<sup>-1</sup> for 1993-2014 calculated by wind sector within the MMA.

| Site | N                  | NE                 | E                  | SE                 | S                  | SW                 | W                  | NW                 |
|------|--------------------|--------------------|--------------------|--------------------|--------------------|--------------------|--------------------|--------------------|
| GPE  | 0.37 <sup>d</sup>  | 0.35 <sup>d</sup>  | 0.31 <sup>d</sup>  | 0.06               | -0.23              | -0.09              | 0.18 <sup>b</sup>  | 0.43 <sup>d</sup>  |
| SNN  | 0.55 <sup>d</sup>  | 0.59 <sup>d</sup>  | 0.18 <sup>d</sup>  | 0.37 <sup>d</sup>  | 0.48               | 0.31               | 0.72 <sup>d</sup>  | 0.78 <sup>d</sup>  |
| OBI  | -0.46 <sup>d</sup> | -0.46 <sup>d</sup> | -0.39 <sup>d</sup> | -0.83 <sup>d</sup> | -1.36 <sup>d</sup> | -1.52 <sup>d</sup> | -1.14 <sup>d</sup> | -0.56 <sup>d</sup> |
| SNB  | 0.74 <sup>d</sup>  | 0.60 <sup>d</sup>  | 0.53 <sup>d</sup>  | 0.68 <sup>d</sup>  | 0.68 <sup>d</sup>  | 1.01 <sup>d</sup>  | 1.31 <sup>d</sup>  | 1.47 <sup>d</sup>  |
| STA  | 1.47 <sup>d</sup>  | 0.70 <sup>d</sup>  | 0.22 <sup>b</sup>  | 0.10               | 0.41 <sup>c</sup>  | 0.83 <sup>d</sup>  | 1.24 <sup>d</sup>  | 1.38 <sup>d</sup>  |

<sup>a</sup>Level of significance  $p < 0.1$ .

<sup>b</sup>Level of significance  $p < 0.05$ .

<sup>c</sup>Level of significance  $p < 0.01$ .

<sup>d</sup>Level of significance  $p < 0.001$ .

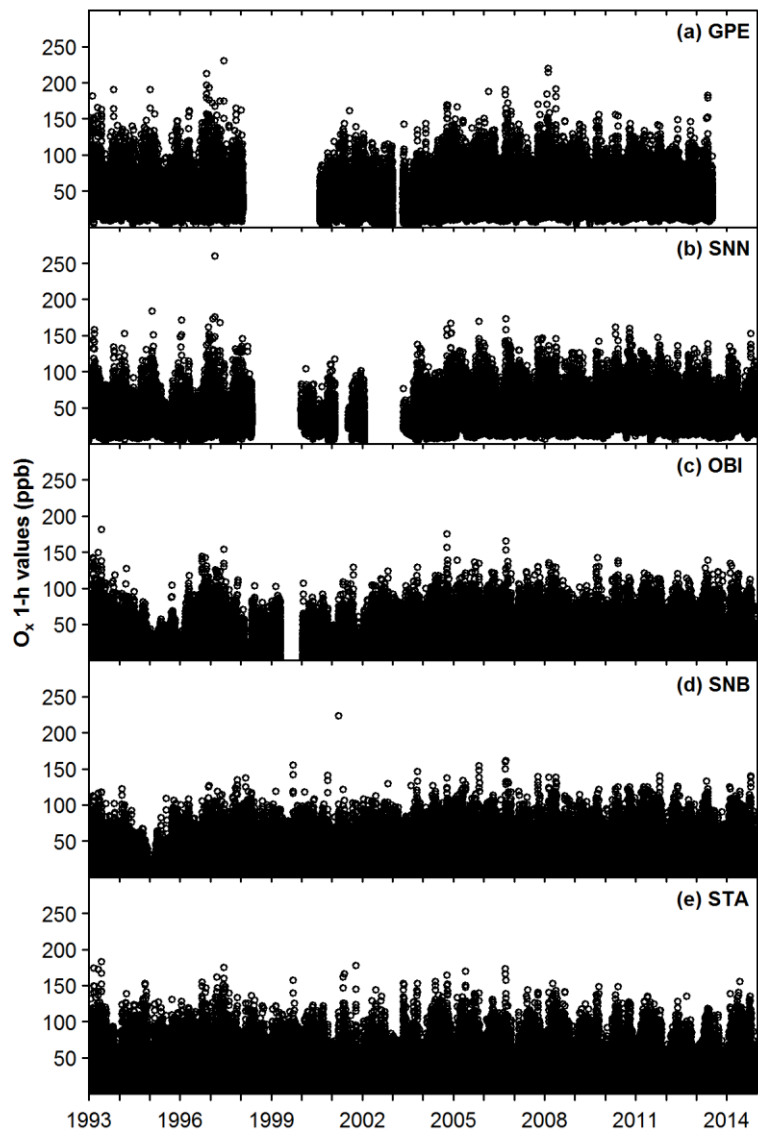

18

19 **Fig. S1.** 1-h values of  $O_x$  calculated at the 5 sites within the MMA during 1993-2014.

20

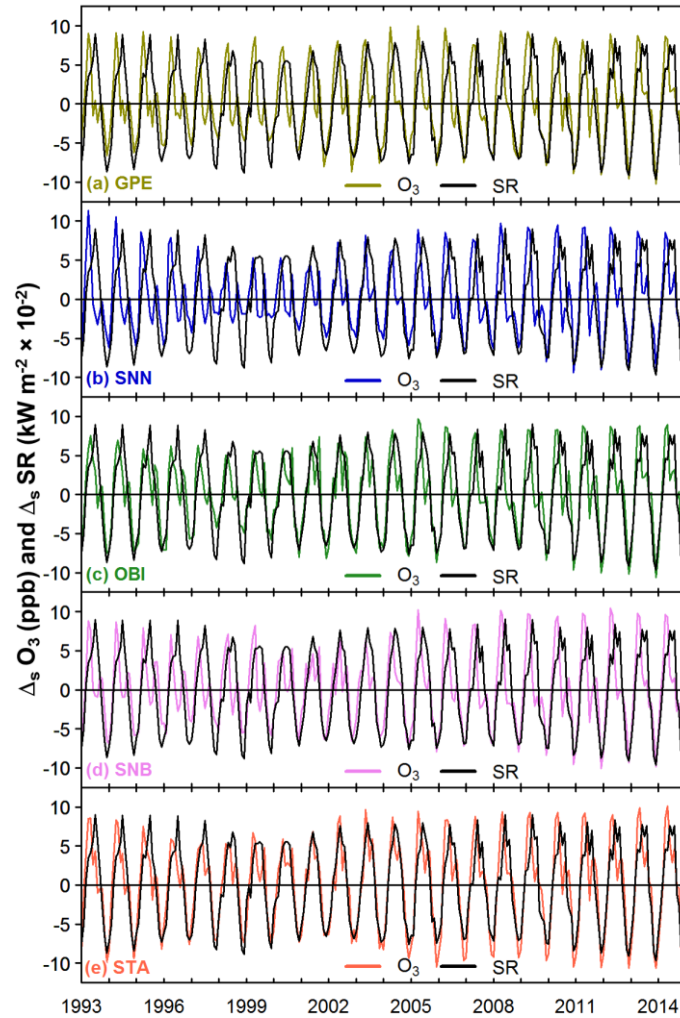

21  
22  
23  
24

**Fig. S2.** Seasonal variations in O<sub>3</sub> mixing ratios and SR at the 5 sites within the MMA, constructed from filtered data using the STL technique developed by Cleveland et al. (1990).

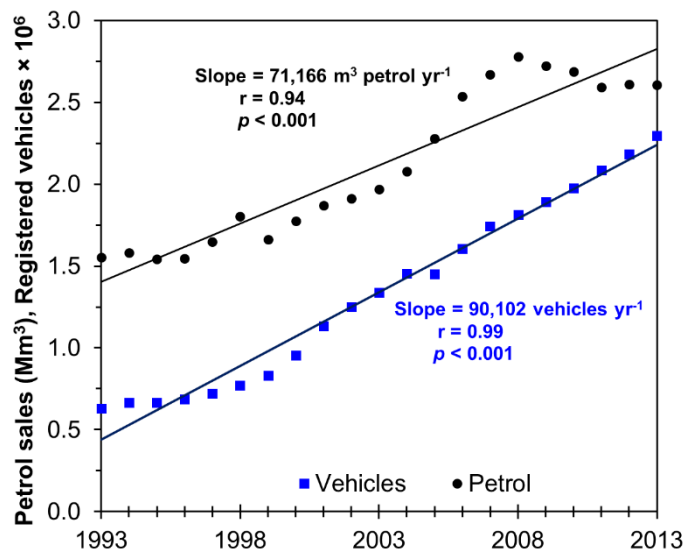

25  
26  
27  
28

**Fig. S3.** Petrol sales in the MMA and registered vehicles in the Nuevo Leon state during 1993-2013.
